# Supplementary material for: Quantification of All-Trans Retinoic Acid by Liquid Chromatography–Tandem Mass Spectrometry and Association with Lipid Profile in Patients with Type 2 Diabetes
Source: Metabolites. 2021 Jan 19;11(1):60. doi: 10.3390/metabo11010060 (PMC7835841; doi:10.3390/metabo11010060)
Supplement: Supplementary file 1 [file metabolites-11-00060-s001.pdf]

**Supplementary Table S1.** Assessment of *atRA* stability upon UV-exposure. Stability is defined as the mean of the quantified concentration of three spiked concentrations (nominal) in human artificial plasma samples exposed to UV-light (254 nm) for the given period of time (n=3).

| Nominal<br>concentration<br>[pg mL <sup>-1</sup> ] | UV-exposure at<br>254 nm<br>[min] | Measured<br>concentration<br>[pg mL <sup>-1</sup> ] |
|----------------------------------------------------|-----------------------------------|-----------------------------------------------------|
| 600                                                | 60                                | 560.8 ± 57.3                                        |
| 600                                                | 120                               | 490.6 ± 78.1                                        |
| 600                                                | 180                               | 341.4 ± 76.0                                        |
| 600                                                | 360                               | 205.5 ± 39.7                                        |

**Supplementary Table S2.** Mean baseline characteristics and *atRA* levels of the control group (as shown in Table 4) and patients with well-adjusted / poorly controlled type 2 diabetes. All parameters were determined prior to collection. Data are mean ± SD; § p = 0.053, \*p < 0.05, \*\*p < 0.01, \*\*\*p < 0.001 vs. controls. All other parameters were statistically not significant (p > 0.05).

|                                          | Controls<br>(n=20) | Type 2<br>Diabetes<br>(n=24) | Type 2<br>Diabetes<br>(n=15) |
|------------------------------------------|--------------------|------------------------------|------------------------------|
| Sex [% male]                             | 63.8               | 65.3                         | 66.6                         |
| Age [years]                              | 42.1 ± 12.3        | 49.6 ± 15.5                  | 60.5 ± 6.13 ***              |
| BMI [kg m <sup>-2</sup> ]                | 24 ± 2.5           | 31.3 ± 6.1 ***               | 24.9 ± 1.8                   |
| Blood glucose [mg dL <sup>-1</sup> ]     | 97.1 ± 12.3        | 186.3 ± 84.3 ***             | 136.3 ± 48.2 ***             |
| HbA1c [%]                                | 5.7 ± 0.8          | 11.2 ± 1.6 ***               | 6.7 ± 1.5 *                  |
| CRP [mg L <sup>-1</sup> ]                | 1.2 ± 1.1          | 12.9 ± 8.6 ***               | 1.3 ± 1.7                    |
| Total Cholesterol [mg dL <sup>-1</sup> ] | 168.4 ± 19.9       | 256.1 ± 74.5 ***             | 179.5 ± 37.3                 |
| Triglycerides [mg dL <sup>-1</sup> ]     | 137.7 ± 24.2       | 285.3 ± 86.4 ***             | 118.3 ± 44.9                 |
| LDL [mg dL <sup>-1</sup> ]               | 82.7 ± 25.7        | 167.5 ± 73.4 ***             | 101.1 ± 30.6                 |
| HDL [mg dL <sup>-1</sup> ]               | 58.2 ± 15.9        | 31.5 ± 9.1 ***               | 55.0 ± 16.4                  |
| <i>AtRA</i> [ng mL <sup>-1</sup> ]       | 1.77 ± 0.45        | 1.38 ± 0.42 **               | 1.47 ± 0.37 §                |

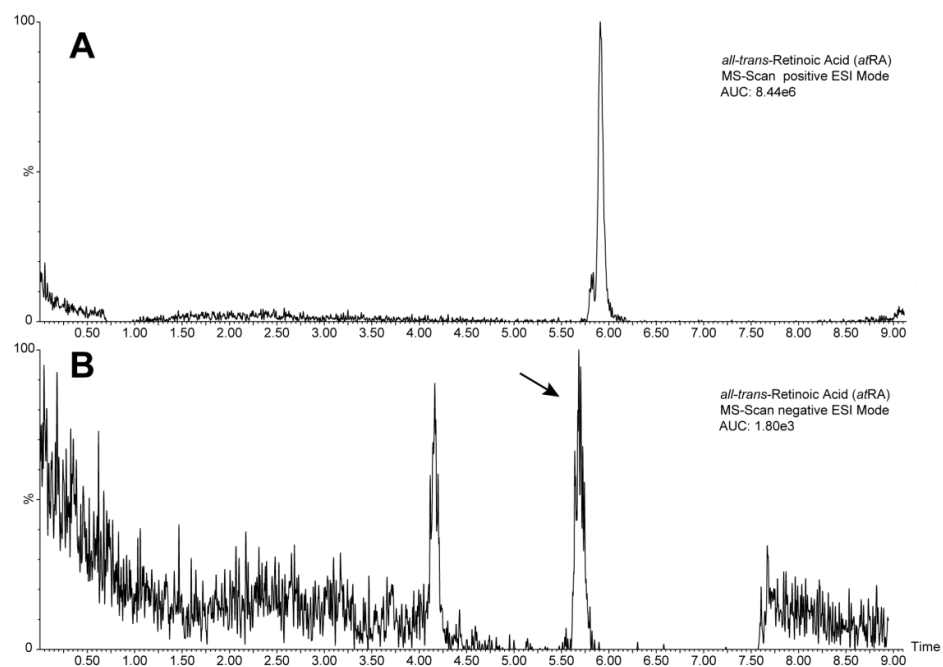

**Supplementary Figure 1.** Comparison of ionization mode of mass spectrometry for *atRA* (100 pmol direct injection on column). (A) Total ion chromatogram of *atRA* with positive MS-Scan. (B) Total ion chromatogram of *atRA* with negative MS-Scan. The arrow indicates the appropriate peak for *atRA*.
